# Supplementary material for: CSN-mediated deneddylation differentially modulates Ci155 proteolysis to promote Hedgehog signalling responses
Source: PubMed Central journal article supplement — Nat Commun. 2011 Feb 8;2:182–. doi: 10.1038/ncomms1185 (PMC3105314; doi:10.1038/ncomms1185), 2011-02-08
Supplement: ncomms1185-s1.pdf [file ncomms1185-s1.pdf]

## **Supplementary information list**

**Supplementary Figure S1** Arm protein levels are increased in *CSN5<sup>null</sup>* mutant clones generated in wing discs.

**Supplementary Figure S2** CSN regulates Ci<sup>155</sup> level by a post-transcriptional mechanism.

**Supplementary Figure S3** Effects of partial Ci depletion on Hh signaling responses.

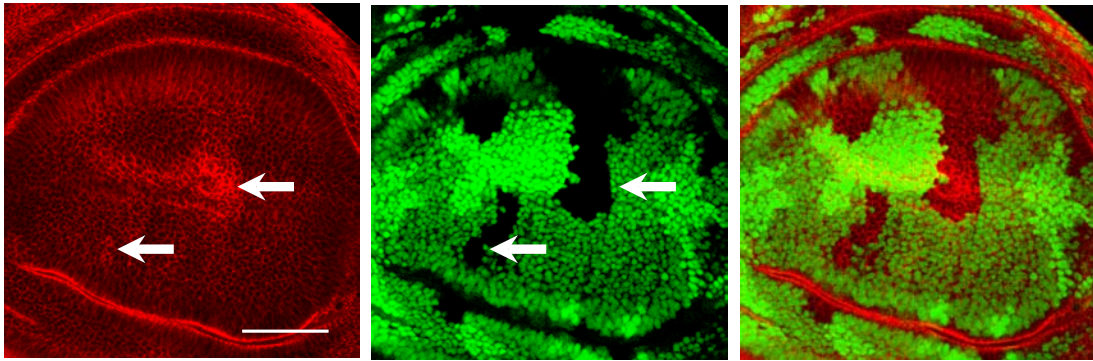

**Supplementary Figure S1** Arm protein levels are increased in *CSN5<sup>null</sup>* mutant clones generated in wing discs. *CSN5<sup>null</sup>* clones marked by the absence of GFP (green) are generated in wing discs. Arm protein levels (red) are higher in the *CSN5<sup>null</sup>* cells (arrows), as compared to wild-type cells. Scale bar represents 50  $\mu\text{m}$ .

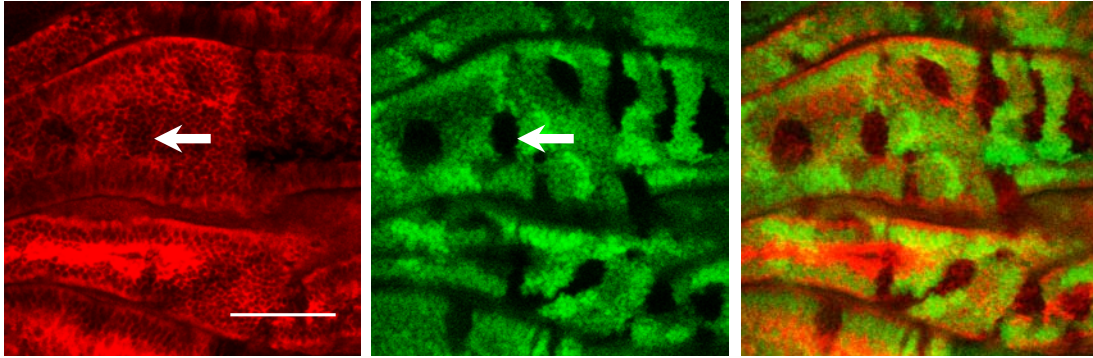

**Supplementary Figure S2 CSN regulates Ci<sup>155</sup> levels by a post-transcriptional mechanism.** *CSN5<sup>null</sup>* clones marked by the absence of GFP (green) are generated in wing discs expressing the wild-type *HA-ci* transgene under the control of *ms1096-GAL4*. The levels of Ci revealed by 2A1 staining (red) are reduced in *CSN5<sup>null</sup>* clones (arrows). Scale bar represents 50  $\mu\text{m}$ .

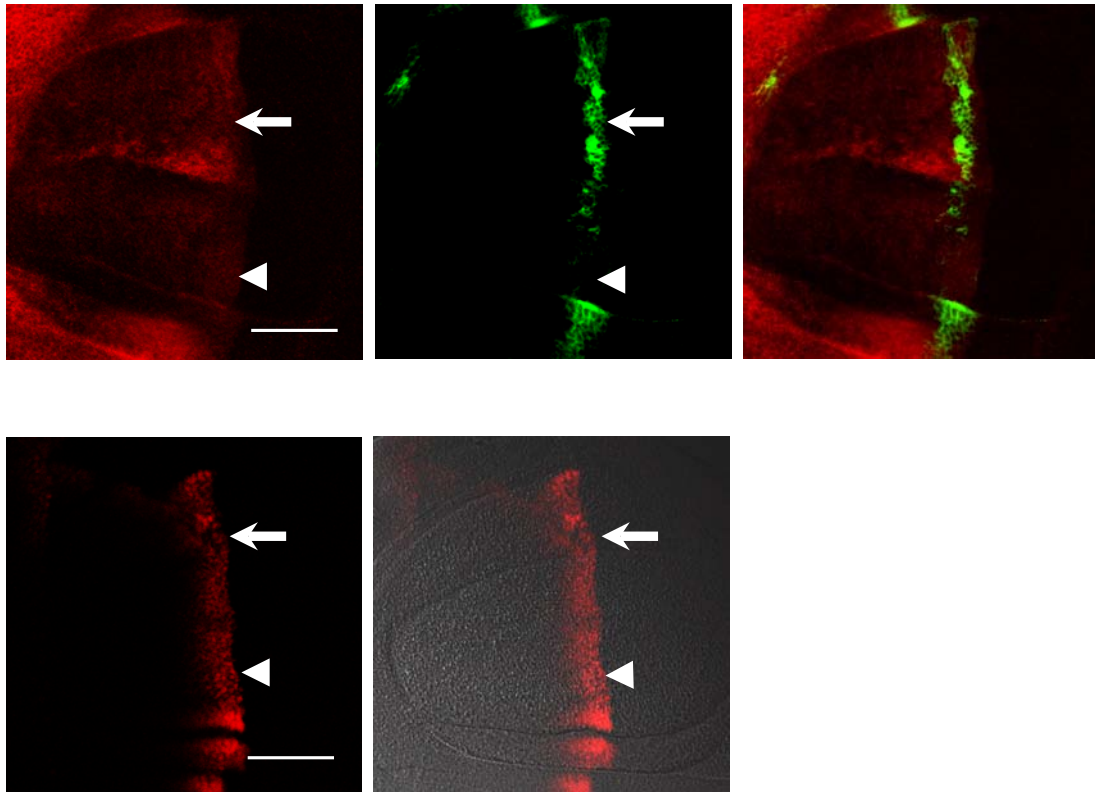

**Supplementary Figure S3 Effects of partial Ci depletion on Hh signaling responses.**

(Upper row of panels) By using *ms1096-GAL4*, which has higher expression in dorsal and lower expression in ventral wing pouches, to express *ci-dsRNAi*, the expression levels of *dpp-lacZ* (green) are abolished in dorsal (arrowhead) but remain detectable in ventral region (arrow). The corresponding Ci levels are also revealed by Ci staining (red). (Lower row of panels) *ms1096-GAL4* driven *ci-dsRNAi* has no significant effect on *ptc-lacZ* expression (red) in both dorsal (arrowhead) and ventral (arrow) wing pouch. Scale bars represent 50  $\mu\text{m}$ .
